# Supplementary material for: Identification and validation of a novel stress granules-related prognostic model in colorectal cancer
Source: Front Genet. 2023 May 2;14:1105368. doi: 10.3389/fgene.2023.1105368 (PMC10187888; doi:10.3389/fgene.2023.1105368)
Supplement: Supplementary file 1 [file Table2.XLSX]

## Sheet: Table S2
Table S2: The list of 233 differentially expressed SGs-related genes (DESGGs, FDR < 0.05, log2 fold change |FC| ≥ 1) between tumor and normal tissues from TCGA database.
gene	conMean	treatMean	logFC	pValue	fdr
SHH	1.22954	6.05515	2.30005	1.10234e-24	8.41375e-24
PRDX4	31.4064	79.8851	1.34687	1.8707e-24	1.38543e-23
CEBPB	11.4758	36.3211	1.66221	5.63012e-26	6.19314e-25
SCG3	1.04459	0.267355	-1.9661	3.10244e-29	9.59712e-28
PDE5A	8.00247	2.33609	-1.77635	3.88484e-25	3.30211e-24
SGK1	25.317	4.16384	-2.60412	7.06435e-22	3.74761e-21
TPM1	79.2963	27.0106	-1.55373	1.62918e-15	4.63355e-15
SPARC	73.6866	209.279	1.50595	1.55081e-14	4.0702e-14
CNR1	1.39558	0.109287	-3.67467	7.30901e-30	4.20549e-28
MAPT	0.572005	0.126064	-2.18187	2.30972e-19	9.23889e-19
SLC30A8	0.049719	0.0102673	-2.27574	8.16255e-30	4.36114e-28
CCL5	29.0295	12.8826	-1.1721	6.37896e-14	1.59581e-13
CP	2.19651	0.776765	-1.49967	5.54439e-26	6.18986e-25
COL1A1	42.0168	293.872	2.80615	2.19855e-21	1.08908e-20
CCDC88B	2.9523	7.85806	1.41233	3.21661e-05	4.48886e-05
LEP	0.413986	0.158214	-1.38771	2.01523e-11	4.29456e-11
SCG2	5.94006	1.30894	-2.18208	1.18325e-26	1.47512e-25
CXCL8	4.50656	68.1394	3.91839	4.32236e-21	2.05932e-20
TOP2A	9.98222	29.0284	1.54004	2.037e-23	1.31351e-22
ABCA12	0.0195235	0.257691	3.72236	1.05203e-07	1.71816e-07
TREM2	2.38349	5.71278	1.26112	5.07268e-05	6.97493e-05
CD36	4.57996	0.911767	-2.3286	4.85915e-29	1.34617e-27
BMP2	16.7762	4.87365	-1.78334	2.7449e-25	2.44426e-24
HMOX1	32.4094	12.1604	-1.41423	1.13629e-21	5.8617e-21
PRKCB	2.92745	0.602728	-2.28006	1.32549e-27	2.15535e-26
CALCA	0.0418714	1.51081	5.17321	5.05127e-09	8.95344e-09
OXT	0.056367	0.17173	1.60722	0.00052762	0.000681624
KIT	4.77706	1.59648	-1.58123	1.44111e-22	8.29195e-22
CAV1	42.2839	10.5727	-1.99977	2.15336e-21	1.07381e-20
EDNRA	0.936349	3.78904	2.01671	1.27658e-18	4.84713e-18
F5	0.24562	1.41191	2.52315	0.00392971	0.00478733
PLCG1	4.57177	10.3928	1.18476	1.0733e-20	4.86565e-20
F2	0.0188688	0.908344	5.58916	1.36189e-14	3.58695e-14
COMT	12.7046	29.7352	1.22682	7.81446e-25	6.15286e-24
SERPINE1	3.78712	16.47	2.12067	1.47172e-17	5.07302e-17
CDK5	3.92707	7.88033	1.0048	4.48271e-25	3.72563e-24
CTSG	6.02421	0.658885	-3.19267	1.29899e-29	5.11393e-28
SYP	1.98122	0.685562	-1.53103	3.49666e-27	5.02981e-26
PRDX6	198.827	79.592	-1.32082	7.97686e-28	1.42114e-26
UCN2	0.0164516	0.460187	4.80592	1.61084e-29	5.62073e-28
CLDN5	8.31712	2.58951	-1.6834	2.30635e-25	2.07849e-24
PRKG1	2.72975	1.26334	-1.11153	8.15511e-16	2.32825e-15
BCL2L1	22.8846	49.776	1.12107	7.5208e-23	4.46473e-22
NGF	0.625435	0.306621	-1.0284	3.94258e-10	7.50394e-10
AGTR1	2.20244	0.207389	-3.40869	7.18286e-24	4.92916e-23
COL4A1	21.0578	51.4724	1.28945	3.25023e-15	8.90538e-15
TRIB3	1.77049	27.6141	3.96318	3.32742e-32	4.97783e-30
MMP9	8.78347	24.5081	1.4804	1.39663e-06	2.14514e-06
CBFB	6.36272	17.4042	1.45172	1.64112e-27	2.61183e-26
MMP3	0.859435	26.7736	4.96128	2.13805e-25	1.9744e-24
PRL	0.0142504	0.0549809	1.94793	0.00486004	0.0058634
ELANE	0.771724	0.0728935	-3.40422	8.99732e-33	1.6825e-30
GRB7	5.0909	21.5966	2.08481	1.44806e-26	1.77566e-25
CPT2	24.4328	9.95637	-1.29513	9.68055e-29	2.26283e-27
VIP	33.1167	3.59857	-3.20206	1.57322e-29	5.62073e-28
EIF4EBP1	21.5933	64.8762	1.5871	1.14426e-24	8.64555e-24
CSF2	0.0792575	1.01578	3.6799	2.08464e-19	8.38339e-19
PALLD	34.2783	12.2029	-1.49007	7.31543e-11	1.4789e-10
PTK2B	14.8565	6.85482	-1.1159	5.93451e-23	3.55121e-22
GRP	0.38577	1.71384	2.15142	1.47503e-08	2.54222e-08
PTGS1	20.0836	2.97558	-2.75478	2.48475e-28	5.02322e-27
ACE	10.2242	4.27348	-1.25851	0.034938	0.0394173
CPEB1	0.402928	0.0463206	-3.1208	7.98207e-29	1.926e-27
FLI1	2.28769	1.045	-1.13039	2.08006e-21	1.04422e-20
EPAS1	40.7949	19.6695	-1.05243	4.04028e-24	2.87822e-23
HSPD1	64.1586	171.267	1.41653	6.22017e-26	6.74302e-25
NOTCH3	3.35803	9.35248	1.47774	4.56656e-17	1.4787e-16
OLR1	0.145202	2.20394	3.92395	4.70098e-22	2.58554e-21
RELN	0.709062	0.127666	-2.47354	7.40973e-26	7.80631e-25
MAOB	13.6108	3.00992	-2.17696	3.44751e-22	1.92443e-21
CLU	46.5484	10.3118	-2.17444	1.93734e-25	1.83434e-24
HSPH1	8.21919	28.077	1.77232	1.71297e-21	8.71635e-21
SNCA	1.44586	0.423209	-1.77248	4.30073e-19	1.66681e-18
SMPD1	32.5559	10.3997	-1.64638	2.25756e-29	7.34199e-28
GFI1B	0.516874	0.132593	-1.9628	1.3776e-24	1.03045e-23
MIF	21.6317	57.4847	1.41003	1.41861e-19	5.83033e-19
F2R	4.79179	10.6854	1.157	6.87217e-16	1.97707e-15
MAOA	80.3216	22.3317	-1.84669	1.29291e-29	5.11393e-28
IGF2BP3	0.034038	0.614641	4.17453	0.000118209	0.000158744
CD207	0.81155	0.332806	-1.286	6.47035e-17	2.0683e-16
FGF2	1.74876	0.58585	-1.57772	2.43862e-16	7.38497e-16
TRPV3	0.995272	0.148613	-2.74353	2.74962e-22	1.5464e-21
IL10	0.557273	0.258341	-1.10911	9.8831e-14	2.43176e-13
PABPC1	208.612	460.006	1.14083	3.33803e-26	3.8413e-25
ITGAL	4.03986	2.00146	-1.01325	7.94631e-14	1.96816e-13
KCNJ5	0.450163	0.222014	-1.0198	5.58418e-10	1.05479e-09
SLC2A1	16.8609	62.975	1.90109	7.27647e-21	3.38062e-20
GP1BA	0.763848	0.356094	-1.10103	4.2875e-13	9.92894e-13
MYOC	3.57407	0.133612	-4.74144	7.96046e-35	2.97721e-32
GZMA	17.2734	6.76458	-1.35248	5.00205e-13	1.15479e-12
NPY	1.16163	0.169366	-2.77793	7.19256e-27	9.27592e-26
NR3C2	18.9998	3.20976	-2.56545	1.65492e-31	1.54735e-29
SCARB1	8.02039	17.2141	1.10185	6.5206e-19	2.48848e-18
PIK3CG	1.71068	0.558566	-1.61477	1.30427e-22	7.56274e-22
REN	0.325883	1.9182	2.55733	0.000297624	0.000391253
TH	0.0403065	0.477973	3.56785	3.1283e-17	1.03082e-16
BCHE	5.67583	0.310166	-4.19372	1.02082e-29	4.77233e-28
BMP6	2.4463	0.737485	-1.72992	8.67807e-25	6.76167e-24
HSPB8	37.9634	3.18038	-3.57734	8.83769e-22	4.62279e-21
BCL2	3.55474	1.23007	-1.531	3.04312e-26	3.55665e-25
ADCYAP1R1	0.787569	0.0469258	-4.06895	1.26267e-29	5.11393e-28
CRYAB	18.0938	3.68154	-2.29711	2.38892e-21	1.1756e-20
BDNF	0.0504827	0.12974	1.36176	2.02947e-09	3.70255e-09
GLA	8.19983	18.446	1.16964	5.74547e-25	4.62108e-24
MYH11	331.545	16.4614	-4.33205	1.67712e-25	1.6292e-24
RAB27A	13.3811	4.65083	-1.52463	5.57902e-29	1.4904e-27
NDRG1	79.3615	38.9654	-1.02625	9.77511e-12	2.11323e-11
EGOT	0.0205685	0.140502	2.77209	1.75871e-09	3.23222e-09
NPM1	83.5896	177.166	1.0837	6.1051e-20	2.59467e-19
CDK1	5.81058	17.6209	1.60053	2.60681e-23	1.66658e-22
IGF1	0.33714	0.106488	-1.66266	1.79895e-23	1.19081e-22
NOD2	0.441536	1.34435	1.60631	3.61917e-16	1.0658e-15
SLC8A1	1.28032	0.473781	-1.43422	2.81121e-13	6.61253e-13
PPARGC1A	3.79672	1.20455	-1.65626	1.59025e-25	1.57708e-24
PRKAA2	1.09714	0.331666	-1.72595	1.84454e-19	7.49844e-19
ADRB2	0.796985	0.225107	-1.82394	3.03512e-27	4.45151e-26
ADIPOQ	1.83472	0.517348	-1.82635	6.84072e-27	8.97695e-26
GAP43	2.95627	0.363433	-3.02402	7.97969e-28	1.42114e-26
TIMP1	48.8626	209.695	2.10149	1.11344e-27	1.93687e-26
PRKDC	7.901	19.8229	1.32706	4.00751e-21	1.92155e-20
GSTP1	144.347	357.726	1.30931	9.1255e-23	5.3747e-22
GZMB	2.05167	10.6139	2.37108	2.70126e-15	7.48348e-15
XDH	19.1546	4.19848	-2.18976	4.48271e-25	3.72563e-24
MASTL	2.37971	5.03269	1.08054	3.48178e-23	2.17031e-22
TNFRSF10B	7.2351	18.7407	1.37309	6.76703e-26	7.23105e-25
KITLG	9.52909	4.51953	-1.07616	1.20245e-19	4.99685e-19
CLSPN	0.715882	1.79221	1.32394	1.02874e-16	3.26059e-16
CR1	0.511762	0.184626	-1.47086	7.33258e-16	2.10144e-15
CDKN1A	106.804	52.8528	-1.01492	1.84049e-18	6.84917e-18
KIF1A	0.767273	0.144011	-2.41356	3.65293e-27	5.15546e-26
LCN2	86.9947	448.993	2.36769	5.97595e-11	1.21468e-10
CHGB	3.67246	1.51111	-1.28114	2.66638e-28	5.24856e-27
SORBS1	22.0645	5.22126	-2.07926	6.07061e-14	1.52376e-13
CDKN3	4.72356	11.8091	1.32195	2.04384e-20	9.04609e-20
NRG1	0.581836	0.241187	-1.27046	1.38271e-17	4.78828e-17
KRT16	0.0261828	1.58147	5.9165	2.00954e-21	1.01563e-20
ITPR1	2.6363	1.06824	-1.30327	3.57237e-18	1.30348e-17
PLAU	5.70852	26.0253	2.18872	8.06916e-26	8.38296e-25
PCNA	58.5051	136.045	1.21745	8.99115e-21	4.10084e-20
GAST	0.0095454	0.229741	4.58906	1.86103e-09	3.41188e-09
GH1	0.0354886	0.0133927	-1.40591	2.88318e-16	8.66378e-16
DRD2	0.125396	1.28615	3.35849	0.000327977	0.000430397
PENK	1.26925	0.145349	-3.12638	3.29452e-13	7.72509e-13
KRT1	0.477231	0.0992054	-2.2662	3.76617e-18	1.36678e-17
PKM	76.2706	153.352	1.00765	2.9595e-21	1.43747e-20
PCSK2	0.917072	0.037929	-4.59566	3.99371e-33	9.95766e-31
KCNJ11	0.504035	1.45086	1.52531	2.13738e-17	7.16933e-17
SNAP25	1.15704	0.215896	-2.42203	2.18148e-25	1.98994e-24
LIMA1	61.9	25.3756	-1.2865	2.47068e-26	2.98075e-25
PINK1	12.2736	4.82203	-1.34785	3.31252e-31	2.60261e-29
HSP90AB1	236.605	550.867	1.21922	2.09908e-28	4.36143e-27
VEGFA	4.24813	13.536	1.67191	7.11669e-29	1.83561e-27
IFNG	0.153445	0.334741	1.12532	0.000286479	0.000377264
GAL	3.46626	9.90253	1.51442	0.00336702	0.00412874
UCN	0.222032	1.21902	2.45688	2.22723e-24	1.6333e-23
CYP2E1	0.0542275	0.383116	2.82069	0.0384405	0.0433034
CACNA1A	0.177821	0.0758365	-1.22946	4.65052e-19	1.78389e-18
FLT3	0.38607	0.127157	-1.60226	9.59137e-25	7.39623e-24
SLC18A2	0.384767	0.175183	-1.13512	5.6356e-18	2.00735e-17
YTHDF1	14.2675	32.4092	1.18367	3.97304e-30	2.47653e-28
ADAMTSL1	1.22225	0.311649	-1.97155	2.67634e-27	4.08551e-26
GALK1	4.18742	11.5802	1.46753	5.58681e-24	3.90554e-23
TRPM2	1.473	4.84891	1.7189	3.75428e-15	1.02116e-14
EPO	0.0153166	0.0481865	1.65353	0.0043847	0.00532428
MYLK	45.4305	4.83515	-3.23203	1.60238e-25	1.57708e-24
CAMP	0.299341	0.109033	-1.45702	2.21745e-15	6.18901e-15
AGRN	9.48572	22.0316	1.21574	2.9829e-19	1.18053e-18
SPP1	4.8229	78.8688	4.03148	1.319e-16	4.11087e-16
WFS1	9.32252	19.648	1.07559	2.04757e-09	3.72648e-09
MAPK10	0.66376	0.184959	-1.84346	7.70984e-27	9.77451e-26
SLC6A3	0.00596366	0.0363138	2.60625	5.41409e-05	7.43072e-05
NR3C1	5.22237	1.69062	-1.62715	3.6053e-26	4.08601e-25
VAMP2	22.8116	10.2741	-1.15076	1.43789e-28	3.07297e-27
TERT	0.176509	0.629152	1.83367	1.22411e-12	2.74142e-12
OXTR	0.0762198	0.582253	2.93341	4.47958e-29	1.28874e-27
ADCY5	3.81387	0.571173	-2.73926	7.97159e-29	1.926e-27
NOS3	1.45895	2.92556	1.00378	8.01393e-11	1.60708e-10
LTF	2.82444	1.2721	-1.15075	5.82517e-06	8.59414e-06
S100B	9.45385	1.8308	-2.36843	1.92198e-23	1.25012e-22
UGT1A1	0.765272	0.122029	-2.64875	5.71023e-22	3.07285e-21
AGT	2.87672	14.7193	2.35521	1.08801e-20	4.90259e-20
ATP8A1	6.66739	3.03173	-1.13698	1.73768e-20	7.73681e-20
FLNC	48.5241	5.24643	-3.20929	2.96325e-15	8.14894e-15
PPBP	0.168293	80.4094	8.90025	2.92842e-16	8.76183e-16
CMA1	3.11597	0.222972	-3.80474	3.47943e-31	2.60261e-29
RNASEL	4.58761	2.13324	-1.1047	5.61742e-25	4.5672e-24
BRCA2	0.350306	1.63293	2.22078	6.1955e-27	8.27542e-26
MYOT	1.01515	0.087736	-3.53239	1.4835e-30	1.00878e-28
CDK2	5.15194	11.329	1.13683	2.82792e-27	4.23057e-26
SLC18A3	0.218067	0.037872	-2.52557	3.71593e-25	3.23199e-24
SYNPO2	41.5845	3.3856	-3.61856	5.15248e-24	3.6359e-23
MAP2	0.405632	0.171181	-1.24465	8.07578e-20	3.37468e-19
DES	885.434	75.5507	-3.55087	2.91893e-21	1.42703e-20
SST	33.8514	0.861771	-5.29577	1.65136e-31	1.54735e-29
CASP7	54.8975	18.898	-1.5385	1.14932e-27	1.95384e-26
GDF15	12.0379	99.8278	3.05185	1.19578e-27	1.98765e-26
IL2	0.0806928	0.0220672	-1.87053	6.90867e-21	3.2298e-20
MMP1	2.57393	66.2858	4.68665	3.00663e-24	2.16246e-23
FSCN1	6.16486	19.1917	1.63834	5.07174e-10	9.60421e-10
FAS	10.4646	4.48062	-1.22374	3.49209e-21	1.68521e-20
SPAG5	3.62334	7.65925	1.07988	2.45033e-19	9.74918e-19
IL1A	0.222925	1.48534	2.73616	1.38439e-16	4.27902e-16
E2F1	3.84504	15.0391	1.96765	1.09284e-28	2.40425e-27
IL1B	3.63844	9.99405	1.45775	7.95108e-07	1.24423e-06
MMRN1	5.26901	0.633265	-3.05665	1.65316e-29	5.62073e-28
KCNE2	0.60159	0.100041	-2.58819	2.34782e-27	3.65868e-26
AGO2	2.97271	6.22533	1.06637	3.49001e-19	1.36677e-18
TXNIP	322.464	122.533	-1.39597	5.8764e-25	4.67612e-24
CEBPE	0.37708	0.18326	-1.04098	1.51734e-05	2.16597e-05
HSPA6	0.717456	2.63691	1.87789	3.31614e-10	6.34392e-10
ITGB3	1.51476	0.591964	-1.35551	3.69682e-11	7.74571e-11
ABCC8	0.204309	0.0505718	-2.01434	1.85358e-25	1.77754e-24
SRPK1	13.2782	26.94	1.02068	3.52658e-20	1.53365e-19
PRKN	0.892637	0.367518	-1.28026	3.82422e-19	1.48985e-18
LDB3	3.47706	0.230997	-3.91193	2.08993e-25	1.95409e-24
PF4	1.09856	4.33528	1.98051	1.2834e-06	1.97527e-06
CHAT	0.204355	0.0109995	-4.21556	9.97908e-41	7.46435e-38
CHGA	93.3401	4.72571	-4.30389	1.56983e-31	1.54735e-29
CD40LG	1.05924	0.496622	-1.09281	5.42266e-16	1.56608e-15
CXCL1	8.82425	70.1372	2.99064	2.44362e-24	1.77459e-23
MB	5.92572	1.46022	-2.0208	1.86685e-23	1.22491e-22
CTLA4	0.483419	1.13526	1.23168	3.21197e-08	5.399e-08
CDKN2A	0.29237	2.45739	3.07126	5.61025e-21	2.63929e-20
RUNX1	1.85603	5.49767	1.5666	3.39673e-28	6.35189e-27
CHEK2	2.50501	5.19452	1.05218	1.55852e-22	8.89905e-22
IGF2BP1	0.0187115	0.700448	5.22628	3.09652e-06	4.67919e-06
MYC	25.8874	108.71	2.07017	2.96427e-28	5.68532e-27
ZC3H12A	9.0299	18.1059	1.00368	3.10052e-09	5.58842e-09
LRRK2	0.715883	0.328099	-1.12559	4.40131e-17	1.43763e-16
PLCG2	2.57389	0.79408	-1.6966	7.60524e-24	5.17157e-23
NOS1	0.451587	0.0504694	-3.16152	4.8811e-16	1.41514e-15
ATP1A2	7.73627	0.27647	-4.80644	8.9056e-30	4.44093e-28
BRCA1	1.35566	3.51038	1.37264	3.48178e-23	2.17031e-22
